# Supplementary material
Source: Springer Nature journal article supplement (https://www.springermedizin.de/resource/supplementary/12950_2009_109_MOESM2_ESM.pdf/9557984)
Supplement: MOESM2 [file 9557984]

**A**

|                    |   |    |    |    |    |     |         |
|--------------------|---|----|----|----|----|-----|---------|
| Insulin ( 100 nM ) | 0 | 0  | 10 | 10 | 10 | 10  | ( min ) |
| IL-8 ( 100 nM )    | 0 | 10 | 0  | 10 | 60 | 360 | ( min ) |

Phospho-Akt ( Thr 308 )

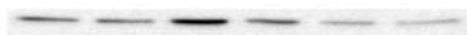

Akt

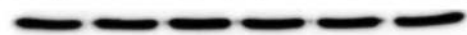

Phospho-Akt ( Thr 308 ) / Akt  
( fold increase )

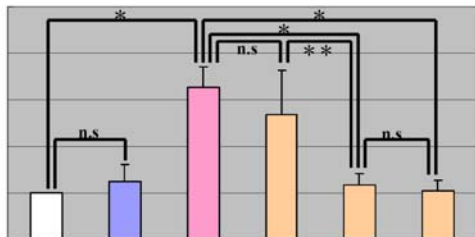\*  $P < 0.01$ , \*\*  $P < 0.05$ **B**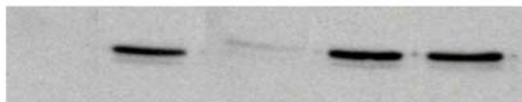

Insulin ( 100 nM , 10 min)

-      +      +      +      +

IL-8 ( 100 nM , 6h)

-      -      +      +      +

PD98059 ( 50  $\mu$  M , 2h )

-      -      -      +      -

SB203580 ( 50  $\mu$  M , 2h)

-      -      -      -      +
